# Supplementary material for: Identification of Escherichia coli and Related Enterobacteriaceae and Examination of Their Phenotypic Antimicrobial Resistance Patterns: A Pilot Study at A Wildlife–Livestock Interface in Lusaka, Zambia
Source: PubMed Central journal article supplement (PMC7996741; doi:10.3390/antibiotics10030238), 2021-02-26
Supplement: antibiotics-10-00238-s001.pdf [file antibiotics-10-00238-s001.pdf]

**SUPPLEMENT 1**

| SN | ID   | Bacteria spp. Code (for API) | Sequence percentage homology (%) | Name and strain                            | E Code |
|----|------|------------------------------|----------------------------------|--------------------------------------------|--------|
| 1  | BV1  | 1                            | 90.3                             | <i>E. coli</i> SD2                         | E12    |
| 2  | BV2  | 1                            | 98.1                             | <i>E. coli</i> LD93-1                      | E16    |
| 3  | BV3  | 2                            | 99.4                             | <i>Shigella flexinerri</i> SD5             | E2     |
| 4  | BV4  | 1                            | 97.9                             | <i>E. coli</i> O157 CFSAN 076619           | E41    |
| 5  | BV5  | 1                            | 98.8                             | <i>E. coli</i> CICC 10389                  | E27    |
| 6  | BV6  | 1                            | 98.8                             | <i>E. coli</i> 824422                      | E32    |
| 7  | BV7  | 1                            | 98.6                             | <i>E. coli</i> UWIWRF 0598                 | E45    |
| 8  | BV8  | 1                            | 99.5                             | <i>E. coli</i> RHB04-C05                   | E6     |
| 9  | BV9  | 1                            | 98.9                             | <i>E. coli</i> LD93-1                      | E3     |
| 10 | BV10 | 1                            | 98.9                             | <i>E. coli</i> 216 C-3878                  | E29    |
| 11 | BV11 | 1                            | 99.6                             | <i>E. coli</i> 824422                      | E17    |
| 12 | BV12 | 1                            | 98.2                             | <i>E. coli</i> LD93-1                      | E30    |
| 13 | BV13 | 2                            | 99.3                             | <i>Shigella sonnei</i> SE6-1               | E19    |
| 14 | BV14 | 1                            | 99.6                             | <i>E. coli</i> CCFM 8341                   | E33    |
| 15 | BV15 | 2                            | 99.1                             | <i>Shigella sonnei</i> SE6-1               | E13    |
| 16 | BV16 | 1                            | 98.5                             | <i>E. coli</i> NF55                        | E51    |
| 17 | PG1  | 1                            | 99                               | <i>E. coli</i> PB7DCRUSTSK                 | E24    |
| 18 | PG2  | 1                            | 98.5                             | <i>E. coli</i> EGE 4946786-102             | E50    |
| 19 | PG3  | 1                            | 98.1                             | <i>E. coli</i> KCJ 5116                    | E44    |
| 20 | PG4  | 1                            | 97.6                             | <i>E. coli</i> PB7DCRUSTSK                 | E36    |
| 21 | PG5  | 1                            | 98.3                             | <i>E. coli</i> 388808                      | E23    |
| 22 | PG6  | 1                            | 99                               | <i>E. coli</i> HUAIAN 1612                 | E35    |
| 23 | PG7  | 1                            | 98.9                             | <i>E. coli</i> LD93-1                      | E7     |
| 24 | PG8  | 2                            | 99.3                             | <i>Shigella sonnei</i> SE6-1               | E39    |
| 25 | PG9  | 2                            | 98.8                             | <i>Shigella sonnei</i> SE6-1               | E40    |
| 26 | PG10 | 1                            | 99.2                             | <i>E. coli</i> PB7DCRUSTSK                 | E56    |
| 27 | PG11 | 2                            | 99.1                             | <i>Shigella</i> spp. NCCP-460              | E42    |
| 28 | PG12 | 1                            | 99.2                             | <i>E. coli</i> FORC-081                    | E37    |
| 29 | PG13 | 1                            | 97.6                             | <i>E. coli</i>                             | E21    |
| 30 | PG14 | 3                            | 99.5                             | <i>Enterobacteriaceae bacterium</i> 28W431 | E14    |
| 31 | PG15 | 2                            | 100                              | <i>Shigella sonnei</i> SE6-1               | E11    |
| 32 | OS1  | 1                            | 99.3                             | <i>E. coli</i> RHB04-C05                   | E10    |
| 33 | OS2  | 1                            | 99.8                             | <i>E. coli</i> YJ4                         | E5     |
| 34 | OS3  | 1                            | 99.6                             | <i>E. coli</i> PGB 01                      | E26    |
| 35 | OS4  | 2                            | 99.1                             | <i>Shigella sonnei</i> SE6-1               | E43    |
| 36 | OS6  | 1                            | 96.7                             | <i>E. coli</i> PNR 347                     | E25    |
| 37 | OS7  | 1                            | 99.2                             | <i>E. coli</i> LD93-1                      | E8     |
| 38 | G1   | 1                            | 90                               | <i>E. coli</i> DPR 12                      | E48    |
| 39 | G3   | 2                            | 99.5                             | <i>Shigella sonnei</i> SE6-1               | E22    |
| 40 | G4   | 2                            | 98.6                             | <i>Shigella sonnei</i> SE6-1               | E46    |
| 41 | G7   | 2                            | 99.3                             | <i>Shigella sonnei</i> SE6-1               | E62    |

| SN | ID  | Bacteria spp. Code (for API) | Sequence percentage homology (%) | Name and strain                | E Code |
|----|-----|------------------------------|----------------------------------|--------------------------------|--------|
| 42 | G9  | 1                            | 91.2                             | <i>E. coli</i> UVF-153         | E15    |
| 43 | G10 | 1                            | 98.8                             | <i>E. coli</i> WP5-W18-ESBL11  | E61    |
| 44 | B1  | 2                            | 99.2                             | <i>Shigella sonnei</i> SE6-1   | E66    |
| 45 | B2  | 1                            | 99.4                             | <i>E. coli</i> DPR 12          | E58    |
| 46 | B3  | 1                            | 99.2                             | <i>E. coli</i> FR 153          | E18    |
| 47 | B4  | 0                            | 95.6                             | <i>E. fergusonii</i> 2438      | E20    |
| 48 | B5  | 1                            | 99.7                             | <i>E. coli</i> F3-1-9          | E52    |
| 49 | B8  | 1                            | 98.8                             | <i>E. coli</i> CCFM 8341       | E47    |
| 50 | B12 | 1                            | 99.6                             | <i>E. coli</i> G1/2            | E59    |
| 51 | B13 | 1                            | 94.9                             | <i>E. coli</i> LD 26-1         | E28    |
| 52 | I1  | 2                            | 97.8                             | <i>Shigella sonnei</i> SE6-1   | E34    |
| 53 | I2  | 1                            | 95                               | <i>E. coli</i> RM 7190         | E9     |
| 54 | I3  | 1                            | 99                               | <i>E. coli</i> FR-2            | E54    |
| 55 | I4  | 1                            | 97.3                             | <i>E. coli</i> AR 0149         | E38    |
| 56 | I5  | 1                            | 99.2                             | <i>E. coli</i> LD93-1          | E4     |
| 57 | I6  | 1                            | 99.3                             | <i>E. coli</i> HUAIAN 141      | E65    |
| 58 | I7  | 1                            | 98.1                             | <i>E. coli</i> ECPF-16         | E63    |
| 59 | I8  | 1                            | 98.1                             | <i>E. coli</i> CCFM 8341       | E31    |
| 60 | I9  | 1                            | 99.5                             | <i>E. coli</i>                 | E1     |
| 61 | I11 | 1                            | 99.1                             | <i>E. coli</i> WP2-S18-ESBL-07 | E57    |
| 62 | I12 | 2                            | 99.3                             | <i>Shigella sonnei</i> SE6-1   | E55    |
| 63 | I13 | 2                            | 99.3                             | <i>Shigella sonnei</i> SE6-1   | E60    |
| 64 | I14 | 1                            | 96.4                             | <i>E. coli</i>                 | E53    |
| 65 | I15 |                              |                                  |                                | E49    |
| 66 | I16 | 1                            | 98.5                             | <i>E. coli</i> CCFM 8341       | E64    |

KEY

**ANIMAL SPECIES ABBREIATIONS**

|    |                                      |
|----|--------------------------------------|
| BV | CATTLE ( <i>Bos taurus</i> )         |
| PG | PIG ( <i>Sus scrofa</i> )            |
| OS | OSTRICH ( <i>Struthio camelus</i> )  |
| G  | GOAT ( <i>Capra hircus</i> )         |
| B  | BUFFALO ( <i>Syncerus caffer</i> )   |
| I  | IMPALA ( <i>Aepyceros melampus</i> ) |

**BACTERIA SPECIES CODE**

|   |                                     |
|---|-------------------------------------|
| 0 | <i>E. fergusonii</i>                |
| 1 | <i>E. coli</i> group                |
| 2 | <i>Shigella</i> species             |
| 3 | <i>Enterobacteriaceae</i> bacterium |
